# Supplementary material for: Photoelectropolymerization of aniline in a dye-sensitized solar cell
Source: Royal Society of Chemistry journal article supplement (doi:10.1039/b610810e), 2006-09-08
Supplement: b610810e.pdf [file b610810e.pdf]

Supplementary Material (ESI) for Photochemical & Photobiological Sciences  
This journal is © The Royal Society of Chemistry and Owner Societies 2006

## **Electronic Supplementary Information**

### **Photoelectropolymerization of Aniline in a Dye-Sensitized Solar Cell**

**Hooi-Sung Kim and Carl C. Wamser\***

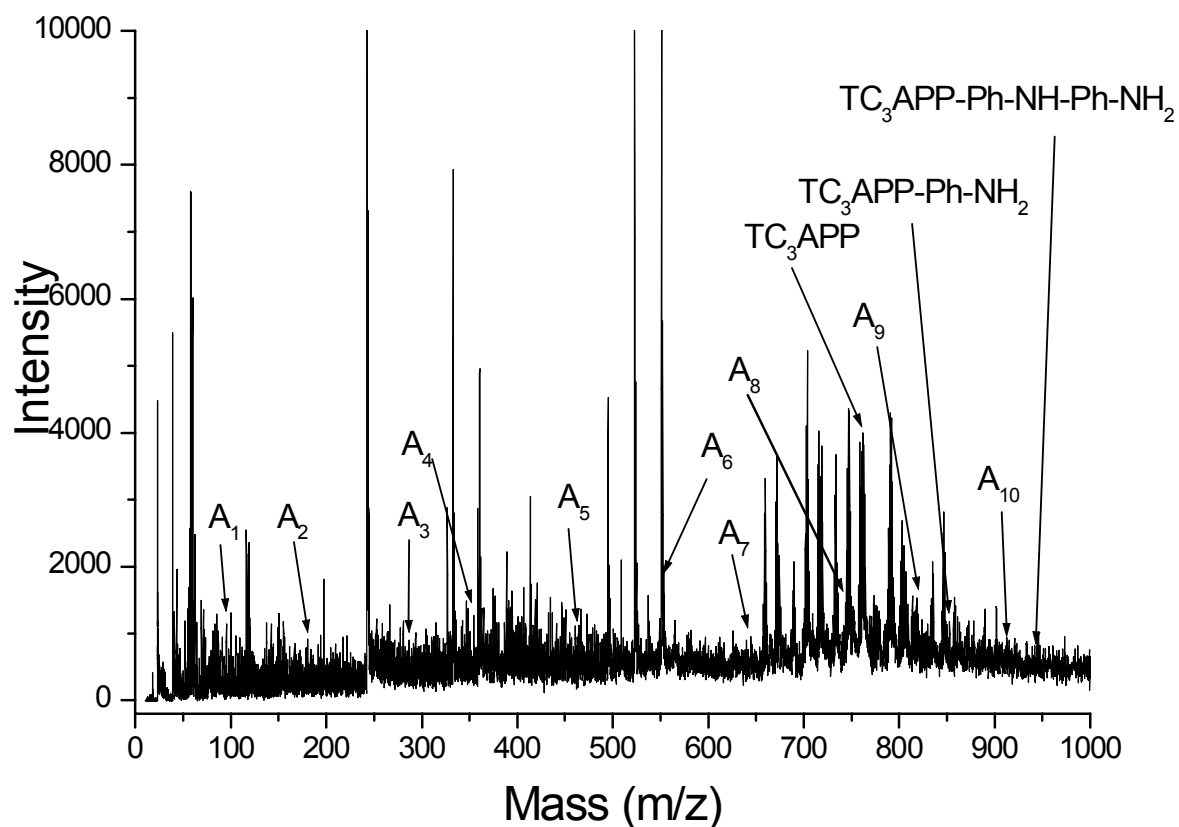

ESI Figure 1. Mass spectrum of photoproduct isolated from finished cells after 2.5 hours irradiation.

A<sub>n</sub> = aniline oligomers (m/z = 93, 183, 275, 366, 457, 548, 639, 730, 821, 912)

TAC<sub>3</sub>PP (m/z = 761.8); TC<sub>3</sub>APP-Ph-NH<sub>2</sub> (m/z = 852.9); TC<sub>3</sub>APP-Ph-NH-Ph-NH<sub>2</sub> (m/z = 944.0)

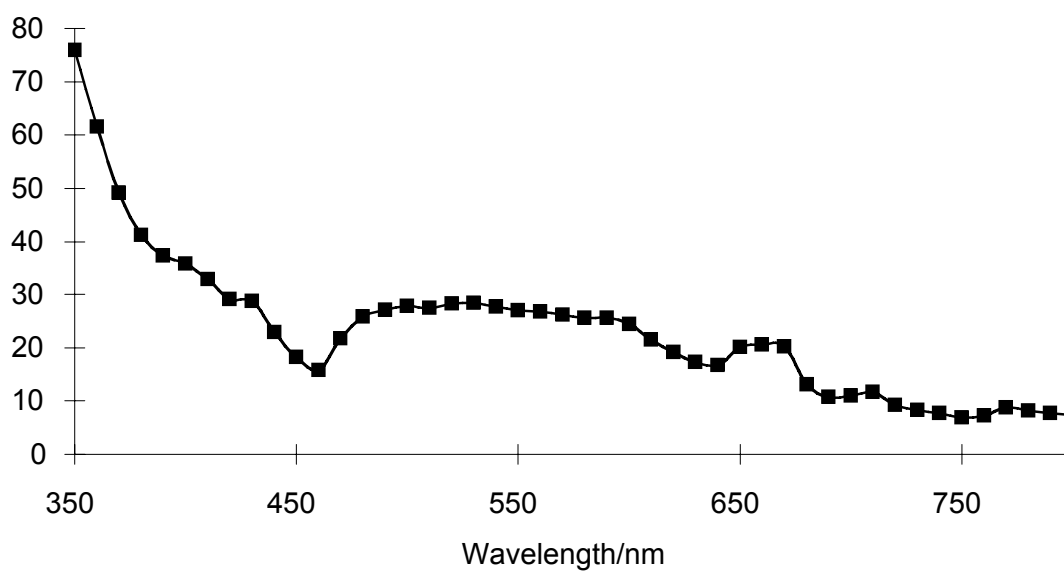

ESI Figure 2. Action spectrum of incident photon-to-current conversion efficiency for a typical TAC<sub>3</sub>PP/PAni cell.

ESI Table 1. Effect of irradiation time for photoelectropolymerization

| Time (hour) | V <sub>oc</sub> (V) | J <sub>sc</sub> (μA/cm <sup>2</sup> ) | FF   | η (%) |
|-------------|---------------------|---------------------------------------|------|-------|
| 0.8         | 0.35                | 107                                   | 0.58 | 0.20  |
| 2.5         | 0.36                | 96.7                                  | 0.64 | 0.21  |
| 4.2         | 0.37                | 93                                    | 0.69 | 0.22  |
| 22          | 0.41                | 93                                    | 0.81 | 0.29  |

ESI Table 2. Effect of adsorption time of TiO<sub>2</sub> electrode in 100 μM TC<sub>3</sub>APP solution

| Adsorption Time (hour) | Absorbance at Q <sub>4</sub> band | Concentration of TC <sub>3</sub> APP on TiO <sub>2</sub> (nmol/cm <sup>2</sup> ) | V <sub>oc</sub> (V) | J <sub>sc</sub> (μA/cm <sup>2</sup> ) | FF   | η (%) |
|------------------------|-----------------------------------|----------------------------------------------------------------------------------|---------------------|---------------------------------------|------|-------|
| 1                      | 0.82                              | 55                                                                               | 0.43                | 86                                    | 0.80 | 0.26  |
| 6                      | 1.6                               | 107                                                                              | 0.44                | 163                                   | 0.78 | 0.43  |
| 12                     | -                                 | -                                                                                | 0.44                | 210                                   | 0.70 | 0.47  |
| 24                     | 1.7                               | 113                                                                              | 0.47                | 150                                   | 0.84 | 0.53  |

ESI Table 3. Effect of different concentrations of TC<sub>3</sub>APP solution on adsorption

| TC <sub>3</sub> APP solution (μM) | Absorbance at Q <sub>4</sub> band | TC <sub>3</sub> APP on TiO <sub>2</sub> (nmol/cm <sup>2</sup> ) | V <sub>oc</sub> (V) | J <sub>sc</sub> (μA/cm <sup>2</sup> ) | FF   | η (%) |
|-----------------------------------|-----------------------------------|-----------------------------------------------------------------|---------------------|---------------------------------------|------|-------|
| 1                                 | -                                 | -                                                               | 0.39                | 99                                    | 0.72 | 0.27  |
| 10                                | 0.16                              | 10.6                                                            | 0.37                | 104                                   | 0.67 | 0.23  |
| 25                                | 0.82                              | 54.7                                                            | 0.39                | 120                                   | 0.84 | 0.38  |
| 50                                | 1.1                               | 73.3                                                            | -                   | -                                     | -    | -     |
| 100                               | 1.7                               | 113                                                             | 0.47                | 150                                   | 0.84 | 0.53  |

ESI Table 4. Effect of the amount of CSA in aniline (100 mmol)

| CSA<br>(mmol) | $V_{oc}$<br>(V) | $J_{sc}$<br>( $\mu A/cm^2$ ) | FF   | $\eta$ (%) |
|---------------|-----------------|------------------------------|------|------------|
| 1             | 0.31            | 31                           | 0.49 | 0.04       |
| 5             | 0.34            | 61                           | 0.58 | 0.11       |
| 10            | 0.37            | 104                          | 0.67 | 0.23       |

ESI Table 5. Effect of the amount of LiClO<sub>4</sub> in aniline (100 mmol)

| LiClO <sub>4</sub><br>(mmol) | V <sub>oc</sub> (V) | J <sub>sc</sub><br>(μA/cm <sup>2</sup> ) | FF   | η (%) |
|------------------------------|---------------------|------------------------------------------|------|-------|
| 1                            | 0.15                | 18                                       | 0.31 | 0.008 |
| 3                            | 0.26                | 19                                       | 0.32 | 0.017 |
| 5                            | 0.33                | 83                                       | 0.59 | 0.14  |
| 10                           | 0.37                | 104                                      | 0.67 | 0.23  |



ESI Table 6. Effect of the amount of polyethylene oxide in aniline (100 mmol)

| PEO <sup>a</sup><br>(mmol) | V <sub>oc</sub><br>(V) | J <sub>sc</sub><br>( $\mu\text{A}/\text{cm}^2$ ) | FF   | $\eta$ (%) |
|----------------------------|------------------------|--------------------------------------------------|------|------------|
| 0                          | 0.32                   | 180                                              | 0.62 | 0.31       |
| 25                         | 0.30                   | 175                                              | 0.61 | 0.29       |
| 38                         | 0.33                   | 166                                              | 0.70 | 0.33       |
| 50                         | 0.47                   | 150                                              | 0.84 | 0.53       |

<sup>a</sup> Molar content of ethylene oxide units

ESI Table 7. Solvent effects and DCA effects

| Solvent | DCA  | Adsorbed TC <sub>3</sub> APP (nmol/cm <sup>2</sup> ) | V <sub>oc</sub> (V) | J <sub>sc</sub> (μA/cm <sup>2</sup> ) | FF   | η (%) |
|---------|------|------------------------------------------------------|---------------------|---------------------------------------|------|-------|
| Ethanol | DCA  | 216                                                  | 0.47                | 150                                   | 0.84 | 0.53  |
|         | none | -                                                    | 0.62                | 46                                    | 0.80 | 0.23  |
| THF     | DCA  | 37.5                                                 | 0.75                | 75                                    | 0.88 | 0.49  |
|         | none | -                                                    | 0.65                | 91                                    | 0.41 | 0.41  |

ESI Table 8. Effect of applied bias voltage during photopolymerization

| Applied Voltage (V) | V <sub>oc</sub> (V) | J <sub>sc</sub> (μA/cm <sup>2</sup> ) | FF   | η (%) |
|---------------------|---------------------|---------------------------------------|------|-------|
| 0.5                 | 0.42                | 82                                    | 0.82 | 0.28  |
| 0.3                 | 0.42                | 84                                    | 0.86 | 0.30  |
| 0.1                 | 0.49                | 100                                   | 0.76 | 0.37  |
| 0                   | 0.47                | 150                                   | 0.84 | 0.53  |
| -0.1                | 0.42                | 82                                    | 0.82 | 0.28  |
| -0.5                | 0.36                | 88                                    | 0.66 | 0.21  |
